# Supplementary material for: Incidental catch of loggerhead sea turtles (Caretta caretta) along the Sicilian coasts by longline fishery
Source: PeerJ. 2018 Aug 7;6:e5392. doi: 10.7717/peerj.5392 (PMC6086082; doi:10.7717/peerj.5392)
Supplement: Supplemental Information 2 [file peerj-06-5392-s002.xlsx]

## Sheet: Foglio1
			Table 1. Number of individuals stranded alive, dead and released after undergoing treatment during the 2014-16 period. The minimum and maximum dimensions of individuals are also reported.
					winter	springer	summer	autumn	size class	CCL > 70
				2014
				live	5	24	38	18	19-82 (45 ±13,5)	3
				dead	13	61	31	16	22-95 (56,2 ±11,4)	11
				released	7	1	7	10	24-64 (42,5 ±13,1)
				2015
				live	15	27	22	11	20-78 (45,7 ±12,6)	1
				dead	20	51	14	9	24-95 (56,2 ±16,3)	9
				released	3	7	3	2	24-78 (44,2 ±15,5)
				2016
				live	9	29	23	15	19-71 (43,3 ±14,1)	1
				dead	5	16	6	4	27-95 (61,1 ±19,7)	2
				released	1	4	12	9	21-71 (49,9 ±13,2)
					winter	springer	summer	autumn
				2014
				live	5	24	38	18
				dead	13	61	31	16
				released	7	1	7	10
				2015
				live	15	27	22	11
				dead	20	51	14	9
				released	3	7	3	2
				2016
				live	9	29	23	15
				dead	5	16	6	4
				released	1	4	12	9
					winter	spring	summer	autumn
				2014	8.7	41.2	33.5	16.5
				2015	20.7	46.1	21.3	11.8
				2016	13.1	42	27.1	17.7
